# Supplementary material for: Comprehensive Transcriptome Profiling of Balding and Non-Balding Scalps in Trichorhinophalangeal Syndrome Type I Patient
Source: PubMed Central journal article supplement — Ann Dermatol. 2017 Aug 25;29(5):597–601. doi: 10.5021/ad.2017.29.5.597 (PMC5597653; doi:10.5021/ad.2017.29.5.597), 2017-08-25
Supplement: ad-29-597-s001.pdf [file ad-29-597-s001.pdf]

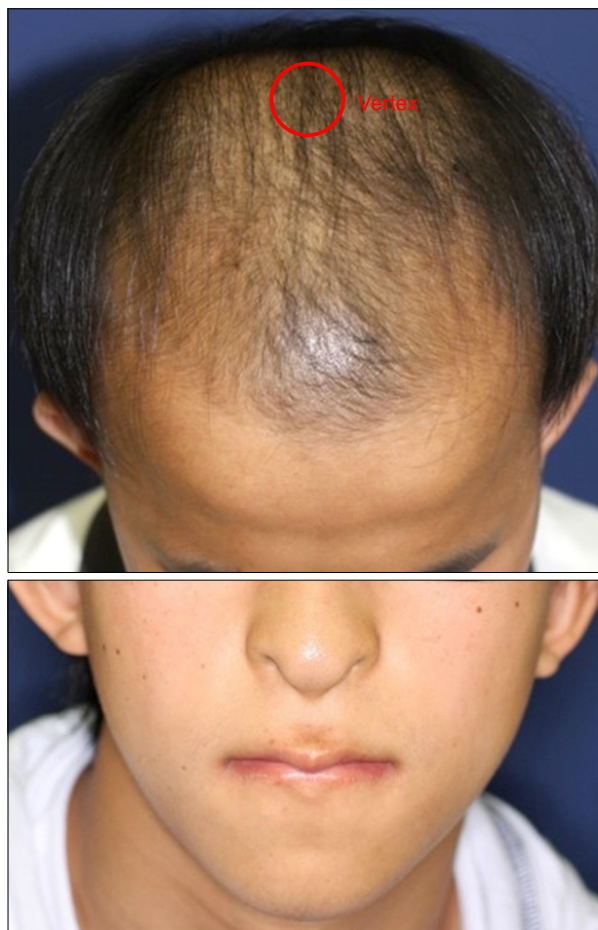

**Supplementary Fig. 1.** Photograph of the trichorhinophalangeal syndrome patient. He has sparse and slowly growing scalp hairs (up), bulbous nose, long philtrum, and thin upper lip (bottom). A red circle indicates vertex area where tissue was obtained but, occiput is not appeared in this photograph.
