# Supplementary material for: Comprehensive Transcriptome Profiling of Balding and Non-Balding Scalps in Trichorhinophalangeal Syndrome Type I Patient
Source: PubMed Central journal article supplement — Ann Dermatol. 2017 Aug 25;29(5):597–601. doi: 10.5021/ad.2017.29.5.597 (PMC5597653; doi:10.5021/ad.2017.29.5.597), 2017-08-25
Supplement: ad-29-597-s002.pdf [file ad-29-597-s002.pdf]

**Supplementary Table 1.** Information of primer pairs used in quantitative real-time polymerase chain reaction

| No. | Symbol          | DEG<br>(RNA-seq) | Forward primer (5'-3')                   | Reverse primer (5'-3')                    | Product<br>size |
|-----|-----------------|------------------|------------------------------------------|-------------------------------------------|-----------------|
| 1   | <i>KRT6C</i>    | Down             | KRT6C_R_2F<br>TCAACTTCCTGAGAGCCTTG       | KRT6C_R_2R<br>CGTATTGGGCCTTGACCTC         | 141             |
| 2   | <i>KRTAP3-1</i> | Down             | KRTAP3-1_R_F<br>TCAACAACCTGTCACCCGACT    | KRTAP3-1_R_R<br>GTAGTGAGTGCTGAAGCCCA      | 171             |
| 3   | <i>MKI67</i>    | Down             | MKI67_R_2F<br>GCCTCCTAATACGCCTCTCA       | MKI67_R_2R<br>TTGTGCCTTCACTTCCACAT        | 160             |
| 4   | <i>GPRC5D</i>   | Down             | GPRC5D_R_F<br>GCTCATGCCTCCAATCTAGTG      | GPRC5D_R_R<br>GCAGGGTGCATATTCACAAA        | 168             |
| 5   | <i>TYRP1</i>    | Down             | TYRP1_R_F<br>GCCATAGCAGTAGTTGGCG         | TYRP1_R_R<br>GGAGAGGCTGGTTAGCTTCA         | 106             |
| 6   | <i>DSC1</i>     | Down             | DSC1_R_F<br>CCACAGACCTTGACGAACC          | DSC1_R_R<br>ACCCATGTCTCGCACTTCC           | 188             |
| 7   | <i>PMEL</i>     | Down             | PMEL_R_2F<br>CTTTCTCCGTGAGCGTGTC         | PMEL_R_2R<br>CCACTACTGTCTCCAAAGTCCC       | 160             |
| 8   | <i>WIF1</i>     | Down             | WIF1_R_2F<br>GGACTTTGTGTGACTCCT<br>GGTT  | WIF1_R_2R<br>ATTCGACAGGGTTGTGGG           | 189             |
| 9   | <i>SOX21</i>    | Down             | SOX21_R_2F<br>CCGAGTGGAACCTGCTCAC        | SOX21_R_2R<br>CGGGAAGGCGAACTTGTC          | 155             |
| 10  | <i>TINAG</i>    | Down             | TINAG_R_F<br>AAGAGAAGTGGACCTA<br>GAGGCTT | TINAG_R_R<br>AGTAGCACAACGCATTCCG          | 170             |
| 11  | <i>TRPS1</i>    | Down             | TRPS1_R_F<br>ATCTGGCGCGACCTATTTAT        | TRPS1_R_R<br>AGCCTCTACGCCTCCGTAA          | 165             |
| 12  | <i>PTGDS</i>    | -                | PTGDS_R_F<br>AACCAGTGTGAGACCCGAAC        | PTGDS_R_R<br>TCCACCACTGACACGGAGTA         | 107             |
| 13  | <i>HBA2</i>     | Up               | HBA2_R_F<br>TACTTCCCGCACTTCGACC          | HBA2_R_R<br>GCAGTGGCTTAGGAGCTTGA          | 189             |
| 14  | <i>GAL</i>      | Up               | GAL_R_F<br>CTCGCCTCCCTCCTCCTC            | GAL_R_R<br>TCTTGTGCTGAATGACCTG            | 148             |
| 15  | <i>DES</i>      | Up               | DES_R_F<br>TATGAGACCATCGCGGCTAA          | DES_R_R<br>ATCAGGGAATCGTTAGTGCC           | 197             |
| 16  | <i>GAPDH</i>    | Control          | GAPDH_R_F<br>GAGCCCCAGCCTTCTCCATG        | GAPDH_R_R<br>GAAATCCCATCACCATCTT<br>CCAGG | 120             |

DEG: differentially expressed gene.
