# Supplementary material for: Comprehensive Transcriptome Profiling of Balding and Non-Balding Scalps in Trichorhinophalangeal Syndrome Type I Patient
Source: PubMed Central journal article supplement — Ann Dermatol. 2017 Aug 25;29(5):597–601. doi: 10.5021/ad.2017.29.5.597 (PMC5597653; doi:10.5021/ad.2017.29.5.597), 2017-08-25
Supplement: ad-29-597-s003.pdf [file ad-29-597-s003.pdf]

**Supplementary Table 2.** DEGs and GO

| Sample      | Gene   | Mod    | Unexp | DEG*  |                      |                            | GO <sup>†</sup>    |                    |                    |
|-------------|--------|--------|-------|-------|----------------------|----------------------------|--------------------|--------------------|--------------------|
|             |        |        |       | Sum   | Up<br>(balding only) | Down<br>(non-balding only) | Biological process | Molecular function | Cellular component |
| Non-balding | 22,449 | 14,723 | 3,871 | 1,242 | 636 (333)            | 606 (224)                  | 45 (2117)          | 17 (643)           | 11 (348)           |
| Balding     | 21,881 | 14,466 | 4,439 |       |                      |                            |                    |                    |                    |

Unexp: unexpressed, DEG: differentially expressed gene, GO: gene ontology. \* $p$ -value  $< 0.05$  and  $\log_2$  fold change  $> 0$ . <sup>†</sup>The number with  $p$ -value  $< 0.001$  (the number of total number).
