# Supplementary material for: Comprehensive Transcriptome Profiling of Balding and Non-Balding Scalps in Trichorhinophalangeal Syndrome Type I Patient
Source: PubMed Central journal article supplement — Ann Dermatol. 2017 Aug 25;29(5):597–601. doi: 10.5021/ad.2017.29.5.597 (PMC5597653; doi:10.5021/ad.2017.29.5.597), 2017-08-25
Supplement: ad-29-597-s004.pdf [file ad-29-597-s004.pdf]

**Supplementary Table 3.** Go terms

| GO_ID      | Category           | Name                                                                  | Description                                                                                                                                                                                                                                                                                                                                                                                                                                                                                                           | GO(P-val):<br>Control vs. Case |
|------------|--------------------|-----------------------------------------------------------------------|-----------------------------------------------------------------------------------------------------------------------------------------------------------------------------------------------------------------------------------------------------------------------------------------------------------------------------------------------------------------------------------------------------------------------------------------------------------------------------------------------------------------------|--------------------------------|
| GO:0000278 | Biological_process | Mitotic cell cycle                                                    | Progression through the phases of the mitotic cell cycle, the most common eukaryotic cell cycle, which canonically comprises four successive phases called G1, S, G2, and M and includes replication of the genome and the subsequent segregation of chromosomes into daughter cells. In some variant cell cycles nuclear replication or nuclear division may not be followed by cell division, or G1 and G2 phases may be absent.                                                                                    | 0.000936                       |
| GO:0001942 | Biological_process | Hair follicle development                                             | The process whose specific outcome is the progression of the hair follicle over time, from its formation to the mature structure. A hair follicle is a tube-like opening in the epidermis where the hair shaft develops and into which the sebaceous glands open.                                                                                                                                                                                                                                                     | 0.000003                       |
| GO:0002741 | Biological_process | Positive regulation of cytokine secretion involved in immune response | Any process that activates or increases the frequency, rate, or extent of cytokine secretion contributing to an immune response.                                                                                                                                                                                                                                                                                                                                                                                      | 0.000934                       |
| GO:0003408 | Biological_process | Optic cup formation involved in camera-type eye development           | The developmental process pertaining to the initial formation of the optic cup, a two-walled vesicle formed from the optic vesicle.                                                                                                                                                                                                                                                                                                                                                                                   | 0.000925                       |
| GO:0006082 | Biological_process | Organic acid metabolic process                                        | The chemical reactions and pathways involving organic acids, any acidic compound containing carbon in covalent linkage.                                                                                                                                                                                                                                                                                                                                                                                               | 0.000937                       |
| GO:0006119 | Biological_process | Oxidative phosphorylation                                             | The phosphorylation of ADP to ATP that accompanies the oxidation of a metabolite through the operation of the respiratory chain. Oxidation of compounds establishes a proton gradient across the membrane, providing the energy for ATP synthesis.                                                                                                                                                                                                                                                                    | 0.000407                       |
| GO:0006120 | Biological_process | Mitochondrial electron transport, NADH to ubiquinone                  | The transfer of electrons from NADH to ubiquinone that occurs during oxidative phosphorylation, mediated by the multisubunit enzyme known as complex I.                                                                                                                                                                                                                                                                                                                                                               | 0.000293                       |
| GO:0006260 | Biological_process | DNA replication                                                       | The cellular metabolic process in which a cell duplicates one or more molecules of DNA. DNA replication begins when specific sequences, known as origins of replication, are recognized and bound by initiation proteins, and ends when the original DNA molecule has been completely duplicated and the copies topologically separated. The unit of replication usually corresponds to the genome of the cell, an organelle, or a virus. The template for replication can either be an existing DNA molecule or RNA. | 0.000002                       |
| GO:0006278 | Biological_process | RNA-dependent DNA replication                                         | A DNA replication process that uses RNA as a template for RNA-dependent DNA polymerases (e.g. reverse transcriptase) that synthesize the new strands.                                                                                                                                                                                                                                                                                                                                                                 | 0.000003                       |
| GO:0006582 | Biological_process | Melanin metabolic process                                             | The chemical reactions and pathways involving melanins, pigments largely of animal origin. High molecular weight polymers of indole quinone, they are irregular polymeric structures and are divided into three groups: allomelanins in the plant kingdom and eumelanins and pheomelanins in the animal kingdom.                                                                                                                                                                                                      | 0.000046                       |
| GO:0006629 | Biological_process | Lipid metabolic process                                               | The chemical reactions and pathways involving lipids, compounds soluble in an organic solvent but not, or sparingly, in an aqueous solvent. Includes fatty acids; neutral fats, other fatty-acid esters, and soaps; long-chain (fatty) alcohols and waxes; sphingoids and other long-chain bases; glycolipids, phospholipids and sphingolipids; and carotenes, polyprenols, sterols, terpenes and other isoprenoids.                                                                                                  | 0.000129                       |

Supplementary Table 3. Continued

| GO_ID      | Category               | Name                                                 | Description                                                                                                                                                                                                                                                                                                                                                                                 | GO(P-val):<br>Control vs. Case |
|------------|------------------------|------------------------------------------------------|---------------------------------------------------------------------------------------------------------------------------------------------------------------------------------------------------------------------------------------------------------------------------------------------------------------------------------------------------------------------------------------------|--------------------------------|
| GO:0006631 | Biological<br>_process | Fatty acid metabolic process                         | The chemical reactions and pathways involving fatty acids, aliphatic monocarboxylic acids liberated from naturally occurring fats and oils by hydrolysis.                                                                                                                                                                                                                                   | 0.000625                       |
| GO:0006820 | Biological<br>_process | Anion transport                                      | The directed movement of anions, atoms or small molecules with a net negative charge, into, out of or within a cell, or between cells, by means of some agent such as a transporter or pore.                                                                                                                                                                                                | 0.000452                       |
| GO:0007067 | Biological<br>_process | Mitosis                                              | A cell cycle process comprising the steps by which the nucleus of a eukaryotic cell divides; the process involves condensation of chromosomal DNA into a highly compacted form. Canonically, mitosis produces two daughter nuclei whose chromosome complement is identical to that of the mother cell.                                                                                      | 0.00086                        |
| GO:0007079 | Biological<br>_process | Mitotic chromosome movement towards spindle pole     | The cell cycle process in which the directed movement of chromosomes from the center of the spindle towards the spindle poles occurs. This mediates by the shortening of microtubules attached to the chromosomes, during mitosis.                                                                                                                                                          | 0.000924                       |
| GO:0007275 | biological<br>_process | Multicellular organismal development                 | The biological process whose specific outcome is the progression of a multicellular organism over time from an initial condition (e.g. a zygote or a young adult) to a later condition (e.g. a multicellular animal or an aged adult).                                                                                                                                                      | 0.000008                       |
| GO:0007405 | Biological<br>_process | Neuroblast proliferation                             | The expansion of a neuroblast population by cell division. A neuroblast is any cell that will divide and give rise to a neuron.                                                                                                                                                                                                                                                             | 0.000664                       |
| GO:0007442 | Biological<br>_process | Hindgut morphogenesis                                | The process in which the anatomical structures of the hindgut are generated and organized.                                                                                                                                                                                                                                                                                                  | 0.000059                       |
| GO:0008202 | Biological<br>_process | Steroid metabolic process                            | The chemical reactions and pathways involving steroids, compounds with a 1,2,cyclopentanoperhydrophenanthrene nucleus.                                                                                                                                                                                                                                                                      | 0.000641                       |
| GO:0008544 | Biological<br>_process | Epidermis development                                | The process whose specific outcome is the progression of the epidermis over time, from its formation to the mature structure. The epidermis is the outer epithelial layer of a plant or animal, it may be a single layer that produces an extracellular material (e.g. the cuticle of arthropods) or a complex stratified squamous epithelium, as in the case of many vertebrate species.   | 0                              |
| GO:0009888 | Biological<br>_process | Tissue development                                   | The process whose specific outcome is the progression of a tissue over time, from its formation to the mature structure.                                                                                                                                                                                                                                                                    | 0.000424                       |
| GO:0010976 | Biological<br>_process | Positive regulation of neuron projection development | Any process that increases the rate, frequency or extent of neuron projection development. Neuron projection development is the process whose specific outcome is the progression of a neuron projection over time, from its formation to the mature structure. A neuron projection is any process extending from a neural cell, such as axons or dendrites (collectively called neurites). | 0.000573                       |
| GO:0015914 | Biological<br>_process | Phospholipid transport                               | The directed movement of phospholipids into, out of or within a cell, or between cells, by means of some agent such as a transporter or pore. Phospholipids are any lipids containing phosphoric acid as a mono- or diester.                                                                                                                                                                | 0.000528                       |
| GO:0016337 | biological<br>_process | Cell-cell adhesion                                   | The attachment of one cell to another cell via adhesion molecules.                                                                                                                                                                                                                                                                                                                          | 0.000316                       |
| GO:0018958 | Biological<br>_process | Phenol-containing compound metabolic process         | The chemical reactions and pathways involving a phenol, any compound containing one or more hydroxyl groups directly attached to an aromatic carbon ring.                                                                                                                                                                                                                                   | 0.00009                        |

Supplementary Table 3. Continued

| GO_ID      | Category               | Name                                 | Description                                                                                                                                                                                                                                                                                                                                                                                                                                                                                                                                                 | GO(P-val):<br>Control vs. Case |
|------------|------------------------|--------------------------------------|-------------------------------------------------------------------------------------------------------------------------------------------------------------------------------------------------------------------------------------------------------------------------------------------------------------------------------------------------------------------------------------------------------------------------------------------------------------------------------------------------------------------------------------------------------------|--------------------------------|
| GO:0022900 | Biological<br>_process | Electron transport chain             | A process in which a series of electron carriers operate together to transfer electrons from donors to any of several different terminal electron acceptors to generate a transmembrane electrochemical gradient.                                                                                                                                                                                                                                                                                                                                           | 0.000037                       |
| GO:0022904 | Biological<br>_process | Respiratory electron transport chain | A process in which a series of electron carriers operate together to transfer electrons from donors such as NADH and FADH2 to any of several different terminal electron acceptors to generate a transmembrane electrochemical gradient.                                                                                                                                                                                                                                                                                                                    | 0.000024                       |
| GO:0031069 | Biological<br>_process | Hair follicle morphogenesis          | The process in which the anatomical structures of the hair follicle are generated and organized.                                                                                                                                                                                                                                                                                                                                                                                                                                                            | 0.000274                       |
| GO:0032502 | Biological<br>_process | Developmental process                | A biological process whose specific outcome is the progression of an integrated living unit: an anatomical structure (which may be a subcellular structure, cell, tissue, or organ), or organism over time from an initial condition to a later condition.                                                                                                                                                                                                                                                                                                  | 0.000292                       |
| GO:0033153 | Biological<br>_process | T cell receptor V(D)J recombination  | The process in which T cell receptor V, D, and J, or V and J gene segments, depending on the specific locus, are recombined within a single locus utilizing the conserved heptamer and nonamer recombination signal sequences (RSS).                                                                                                                                                                                                                                                                                                                        | 0.000268                       |
| GO:0042438 | Biological<br>_process | Melanin biosynthetic process         | The chemical reactions and pathways resulting in the formation of melanins, pigments largely of animal origin. High molecular weight polymers of indole quinone, they are irregular polymeric structures and are divided into three groups: allomelanins in the plant kingdom and eumelanins and phaeomelanins in the animal kingdom.                                                                                                                                                                                                                       | 0.00003                        |
| GO:0042445 | Biological<br>_process | Hormone metabolic process            | The chemical reactions and pathways involving any hormone, naturally occurring substances secreted by specialized cells that affects the metabolism or behavior of other cells possessing functional receptors for the hormone.                                                                                                                                                                                                                                                                                                                             | 0.000221                       |
| GO:0042633 | Biological<br>_process | Hair cycle                           | The cyclical phases of growth (anagen), regression (catagen), quiescence (telogen), and shedding (exogen) in the life of a hair; one of the collection or mass of filaments growing from the skin of an animal, and forming a covering for a part of the head or for any part or the whole of the body.                                                                                                                                                                                                                                                     | 0                              |
| GO:0042640 | Biological<br>_process | Anagen                               | The growth phase of the hair cycle. Lasts, for example, about 3 to 6 years for human scalp hair.                                                                                                                                                                                                                                                                                                                                                                                                                                                            | 0.000268                       |
| GO:0043588 | Biological<br>_process | Skin development                     | The process whose specific outcome is the progression of the skin over time, from its formation to the mature structure. The skin is the external membranous integument of an animal. In vertebrates the skin generally consists of two layers, an outer nonsensitive and nonvascular epidermis (cuticle or skarfskin) composed of cells which are constantly growing and multiplying in the deeper, and being thrown off in the superficial layers, as well as an inner vascular dermis (cutis, corium or true skin) composed mostly of connective tissue. | 0                              |
| GO:0044281 | Biological<br>_process | Small molecule metabolic process     | The chemical reactions and pathways involving small molecules, any low molecular weight, monomeric, non-encoded molecule.                                                                                                                                                                                                                                                                                                                                                                                                                                   | 0.000152                       |

Supplementary Table 3. Continued

| GO_ID      | Category               | Name                                                                         | Description                                                                                                                                                                                                                                                                                                                                                                                                                                                                                                         | GO(P-val):<br>Control vs. Case |
|------------|------------------------|------------------------------------------------------------------------------|---------------------------------------------------------------------------------------------------------------------------------------------------------------------------------------------------------------------------------------------------------------------------------------------------------------------------------------------------------------------------------------------------------------------------------------------------------------------------------------------------------------------|--------------------------------|
| GO:0045333 | Biological<br>_process | Cellular respiration                                                         | The enzymatic release of energy from organic compounds (especially carbohydrates and fats) which either requires oxygen (aerobic respiration) or does not (anaerobic respiration).                                                                                                                                                                                                                                                                                                                                  | 0.000415                       |
| GO:0048814 | Biological<br>_process | Regulation of dendrite morphogenesis                                         | Any process that modulates the frequency, rate or extent of dendrite morphogenesis.                                                                                                                                                                                                                                                                                                                                                                                                                                 | 0.000463                       |
| GO:0048856 | Biological<br>_process | Anatomical structure development                                             | The biological process whose specific outcome is the progression of an anatomical structure from an initial condition to its mature state. This process begins with the formation of the structure and ends with the mature structure, whatever form that may be including its natural destruction. An anatomical structure is any biological entity that occupies space and is distinguished from its surroundings. Anatomical structures can be macroscopic such as a carpel, or microscopic such as an acrosome. | 0.000313                       |
| GO:0050773 | Biological<br>_process | Regulation of dendrite development                                           | Any process that modulates the frequency, rate or extent of dendrite development.                                                                                                                                                                                                                                                                                                                                                                                                                                   | 0.00043                        |
| GO:0051301 | Biological<br>_process | Cell division                                                                | The process resulting in the physical partitioning and separation of a cell into daughter cells.                                                                                                                                                                                                                                                                                                                                                                                                                    | 0.000651                       |
| GO:0051302 | Biological<br>_process | Regulation of cell division                                                  | Any process that modulates the frequency, rate or extent of the physical partitioning and separation of a cell into daughter cells.                                                                                                                                                                                                                                                                                                                                                                                 | 0.000262                       |
| GO:0055114 | Biological<br>_process | Oxidation-reduction process                                                  | A metabolic process that results in the removal or addition of one or more electrons to or from a substance, with or without the concomitant removal or addition of a proton or protons.                                                                                                                                                                                                                                                                                                                            | 0.000023                       |
| GO:0060831 | Biological<br>_process | Smoothed signaling pathway involved in dorsal/ventral neural tube patterning | The series of molecular signals generated as a consequence of activation of the transmembrane protein Smoothed contributing to the dorsal/ventral pattern of the neural tube.                                                                                                                                                                                                                                                                                                                                       | 0.000895                       |
| GO:0060900 | Biological<br>_process | Embryonic camera-type eye formation                                          | The developmental process pertaining to the initial formation of a camera-type eye from unspecified neurectoderm. This process begins with the differentiation of cells that form the optic field and ends when the optic cup has attained its shape.                                                                                                                                                                                                                                                               | 0.000289                       |
| GO:0005743 | Cellular<br>_component | Mitochondrial inner membrane                                                 | The inner, i.e. lumen-facing, lipid bilayer of the mitochondrial envelope. It is highly folded to form cristae.                                                                                                                                                                                                                                                                                                                                                                                                     | 0.000532                       |
| GO:0005746 | Cellular<br>_component | Mitochondrial respiratory chain                                              | The protein complexes that form the mitochondrial electron transport system (the respiratory chain), associated with the inner mitochondrial membrane. The respiratory chain complexes transfer electrons from an electron donor to an electron acceptor and are associated with a proton pump to create a transmembrane electrochemical gradient.                                                                                                                                                                  | 0.000077                       |
| GO:0005747 | Cellular<br>_component | Mitochondrial respiratory chain complex I                                    | A protein complex located in the mitochondrial inner membrane that forms part of the mitochondrial respiratory chain. It contains about 25 different polypeptide subunits, including NADH dehydrogenase (ubiquinone), flavin mononucleotide and several different iron-sulfur clusters containing non-heme iron. The iron undergoes oxidation-reduction between Fe(II) and Fe(III), and catalyzes proton translocation linked to the oxidation of NADH by ubiquinone.                                               | 0.000071                       |

Supplementary Table 3. Continued

| GO_ID       | Category               | Name                               | Description                                                                                                                                                                                                                                                                                                                                                                                                                                                                                                                                                                                                                                                                          | GO(P-val):<br>Control vs. Case |
|-------------|------------------------|------------------------------------|--------------------------------------------------------------------------------------------------------------------------------------------------------------------------------------------------------------------------------------------------------------------------------------------------------------------------------------------------------------------------------------------------------------------------------------------------------------------------------------------------------------------------------------------------------------------------------------------------------------------------------------------------------------------------------------|--------------------------------|
| GO:0005833  | Cellular<br>_component | Hemoglobin complex                 | An iron-containing, oxygen carrying complex. In vertebrates it is made up of two pairs of associated globin polypeptide chains, each chain carrying a noncovalently bound heme prosthetic group.                                                                                                                                                                                                                                                                                                                                                                                                                                                                                     | 0.00042                        |
| GO:0005856  | Cellular<br>_component | Cytoskeleton                       | Any of the various filamentous elements that form the internal framework of cells, and typically remain after treatment of the cells with mild detergent to remove membrane constituents and soluble components of the cytoplasm. The term embraces intermediate filaments, microfilaments, microtubules, the microtrabecular lattice, and other structures characterized by a polymeric filamentous nature and long-range order within the cell. The various elements of the cytoskeleton not only serve in the maintenance of cellular shape but also have roles in other cellular functions, including cellular movement, cell division, endocytosis, and movement of organelles. | 0                              |
| GO:0005882  | Cellular<br>_component | Intermediate filament              | A cytoskeletal structure that forms a distinct elongated structure, characteristically 10 nm in diameter, that occurs in the cytoplasm of eukaryotic cells. Intermediate filaments form a fibrous system, composed of chemically heterogeneous subunits and involved in mechanically integrating the various components of the cytoplasmic space. Intermediate filaments may be divided into five chemically distinct classes: Type I, acidic keratins; Type II, basic keratins; Type III, including desmin, vimentin and others; Type IV, neurofilaments and related filaments; and Type V, lamins.                                                                                 | 0                              |
| GO:0004324  | Cellular<br>_component | Protein complex                    | Any macromolecular complex composed of two or more polypeptide subunits, which may or may not be identical. Protein complexes may have other associated non-protein prosthetic groups, such as nucleotides, metal ions or other small molecules.                                                                                                                                                                                                                                                                                                                                                                                                                                     | 0.000038                       |
| GO:00045095 | Cellular<br>_component | Keratin filament                   | A filament composed of acidic and basic keratins (types I and II), typically expressed in epithelial cells. The keratins are the most diverse classes of IF proteins, with a large number of keratin isoforms being expressed. Each type of epithelium always expresses a characteristic combination of type I and type II keratins.                                                                                                                                                                                                                                                                                                                                                 | 0                              |
| GO:00045111 | Cellular<br>_component | Intermediate filament cytoskeleton | Cytoskeletal structure made from intermediate filaments, typically organized in the cytosol as an extended system that stretches from the nuclear envelope to the plasma membrane. Some intermediate filaments run parallel to the cell surface, while others traverse the cytosol; together they form an internal framework that helps support the shape and resilience of the cell.                                                                                                                                                                                                                                                                                                | 0                              |
| GO:00070469 | Cellular<br>_component | Respiratory chain                  | The protein complexes that form the electron transport system (the respiratory chain), associated with a cell membrane, usually the plasma membrane (in prokaryotes) or the inner mitochondrial membrane (on eukaryotes). The respiratory chain complexes transfer electrons from an electron donor to an electron acceptor and are associated with a proton pump to create a transmembrane electrochemical gradient.                                                                                                                                                                                                                                                                | 0.000047                       |
| GO:00097233 | Cellular<br>_component | Alveolar lamellar body membrane    | The lipid bilayer surrounding an alveolar lamellar body, a specialized secretory organelle found in type II pneumocytes and involved in the synthesis, secretion, and reutilization of pulmonary surfactant.                                                                                                                                                                                                                                                                                                                                                                                                                                                                         | 0.000924                       |

Supplementary Table 3. Continued

| GO_ID      | Category           | Name                                                                                  | Description                                                                                                                                                                                                                                                                                                                                                                                                                            | GO(P-val):<br>Control vs. Case |
|------------|--------------------|---------------------------------------------------------------------------------------|----------------------------------------------------------------------------------------------------------------------------------------------------------------------------------------------------------------------------------------------------------------------------------------------------------------------------------------------------------------------------------------------------------------------------------------|--------------------------------|
| GO:0003777 | Molecular_function | Microtubule motor activity                                                            | Catalysis of movement along a microtubule, coupled to the hydrolysis of a nucleoside triphosphate (usually ATP).                                                                                                                                                                                                                                                                                                                       | 0.000495                       |
| GO:0003824 | Molecular_function | Catalytic activity                                                                    | Catalysis of a biochemical reaction at physiological temperatures. In biologically catalyzed reactions, the reactants are known as substrates, and the catalysts are naturally occurring macromolecular substances known as enzymes. Enzymes possess specific binding sites for substrates, and are usually composed wholly or largely of protein, but RNA that has catalytic activity (ribozyme) is often also regarded as enzymatic. | 0.000038                       |
| GO:0003954 | Molecular_function | NADH dehydrogenase activity                                                           | Catalysis of the reaction: NADH + H <sup>+</sup> + acceptor = NAD <sup>+</sup> + reduced acceptor.                                                                                                                                                                                                                                                                                                                                     | 0.000064                       |
| GO:0003964 | Molecular_function | RNA-directed DNA polymerase activity                                                  | Catalysis of the reaction: deoxynucleoside triphosphate + DNA(n) = diphosphate + DNA(n+1). Catalyzes RNA-template-directed extension of the 3'- end of a DNA strand by one deoxynucleotide at a time.                                                                                                                                                                                                                                  | 0.000001                       |
| GO:0004012 | Molecular_function | Phospholipid-translocating ATPase activity                                            | Catalysis of the movement of phospholipids from one membrane bilayer leaflet to the other, driven by the hydrolysis of ATP.                                                                                                                                                                                                                                                                                                            | 0.000887                       |
| GO:0004129 | Molecular_function | Cytochrome-c oxidase activity                                                         | Catalysis of the reaction: 4 ferrocytochrome c + O <sub>2</sub> + 4 H <sup>+</sup> = 4 ferricytochrome c + 2 H <sub>2</sub> O.                                                                                                                                                                                                                                                                                                         | 0.000089                       |
| GO:0005198 | Molecular_function | Structural molecule activity                                                          | The action of a molecule that contributes to the structural integrity of a complex or assembly within or outside a cell.                                                                                                                                                                                                                                                                                                               | 0.000397                       |
| GO:0005344 | Molecular_function | Oxygen transporter activity                                                           | Enables the directed movement of oxygen into, out of or within a cell, or between cells.                                                                                                                                                                                                                                                                                                                                               | 0.000475                       |
| GO:0005509 | Molecular_function | Calcium ion binding                                                                   | Interacting selectively and non-covalently with calcium ions (Ca <sup>2+</sup> ).                                                                                                                                                                                                                                                                                                                                                      | 0.000399                       |
| GO:0008137 | Molecular_function | NADH dehydrogenase (ubiquinone) activity                                              | Catalysis of the reaction: NADH + H <sup>+</sup> + ubiquinone = NAD <sup>+</sup> + ubiquinol.                                                                                                                                                                                                                                                                                                                                          | 0.000064                       |
| GO:0015078 | Molecular_function | Hydrogen ion transmembrane transporter activity                                       | Catalysis of the transfer of hydrogen ions from one side of a membrane to the other.                                                                                                                                                                                                                                                                                                                                                   | 0.000491                       |
| GO:0016491 | Molecular_function | Oxidoreductase activity                                                               | Catalysis of an oxidation-reduction (redox) reaction, a reversible chemical reaction in which the oxidation state of an atom or atoms within a molecule is altered. One substrate acts as a hydrogen or electron donor and becomes oxidized, while the other acts as hydrogen or electron acceptor and becomes reduced.                                                                                                                | 0                              |
| GO:0016614 | Molecular_function | Oxidoreductase activity, acting on CH-OH group of donors                              | Catalysis of an oxidation-reduction (redox) reaction in which a CH-OH group act as a hydrogen or electron donor and reduces a hydrogen or electron acceptor.                                                                                                                                                                                                                                                                           | 0.00061                        |
| GO:0016616 | Molecular_function | Oxidoreductase activity, acting on the CH-OH group of donors, NAD or NADP as acceptor | Catalysis of an oxidation-reduction (redox) reaction in which a CH-OH group acts as a hydrogen or electron donor and reduces NAD <sup>+</sup> or NADP.                                                                                                                                                                                                                                                                                 | 0.000783                       |
| GO:0016628 | Molecular_function | Oxidoreductase activity, acting on the CH-CH group of donors, NAD or NADP as acceptor | Catalysis of an oxidation-reduction (redox) reaction in which a CH-CH group acts as a hydrogen or electron donor and reduces NAD or NADP.                                                                                                                                                                                                                                                                                              | 0.000069                       |
| GO:0016655 | Molecular_function | Oxidoreductase activity, acting on NAD(P)H, quinone or similar compound as acceptor   | Catalysis of an oxidation-reduction (redox) reaction in which NADH or NADPH acts as a hydrogen or electron donor and reduces a quinone or a similar acceptor molecule.                                                                                                                                                                                                                                                                 | 0.000017                       |
| GO:0019825 | Molecular_function | Oxygen binding                                                                        | Interacting selectively and non-covalently with oxygen (O <sub>2</sub> ).                                                                                                                                                                                                                                                                                                                                                              | 0.00049                        |

GO: gene ontology.
